# Supplementary material for: Uncertainty in techno-economic estimates of cellulosic ethanol production due to experimental measurement uncertainty
Source: PubMed Central journal article supplement (PMC3503575; doi:10.1186/1754-6834-5-23), 2012-04-17
Supplement: 1754-6834-5-23-S5.pdf [file 1754-6834-5-23-S5.pdf]

### Examples of Uncertainty Expression Derivation:

#### Uncertainty of yield of glucose from cellulose in the enzymatic hydrolysis unit

The percent yield of glucose from cellulose is calculated from the following expression:

$$Y_{C-G} = \frac{w_G}{f_{IS} \times 1000 \times f_{PG} \times \gamma} \times 100\% \quad (1)$$

The terms in the yield expression are defined in the table below.

| Term      | Description (Units)                                                                                                                                                  |
|-----------|----------------------------------------------------------------------------------------------------------------------------------------------------------------------|
| $Y_{C-G}$ | Yield of glucose from cellulose (percent yield)                                                                                                                      |
| $w_G$     | Weight fraction of glucose in final solution ( g glucose per kg of total solution)                                                                                   |
| $f_{IS}$  | Fraction insoluble solids (mass fraction)                                                                                                                            |
| $f_{PG}$  | Fraction of glucan in pretreated liquor (mass fraction)                                                                                                              |
| $\gamma$  | A (constant) conversion factor that corrects for the change in mass due to the addition of water to the glycosidic bonds during hydrolysis of glucan (dimensionless) |

The factor of 1000 converts grams to kilograms. The term “ $f_{PG}$ ” is the mass fraction of feedstock that is cellulose. It is assumed that all of this cellulose is insoluble, so the  $f_{IS}$  term is required to convert from between the cellulose fraction and the mass fraction of (soluble) glucose.

The mass fraction of glucose is a “derived” quantity, meaning that it is a term calculated from other measurements. This calculation is shown below.

$$w_X = \frac{(1 - f_{IS})(c_{Gf} - c_{Gi})}{\rho_L} \quad (2)$$

| Term     | Description (Units)                                                                |
|----------|------------------------------------------------------------------------------------|
| $w_G$    | Weight fraction of glucose in final solution ( g glucose per kg of total solution) |
| $f_{IS}$ | Fraction insoluble solids (mass fraction) in the slurry after enzymatic hydrolysis |
| $c_{Gf}$ | “Final” concentration of glucose in slurry after enzymatic hydrolysis (g/L)        |
| $c_{Gi}$ | “Initial” concentration of glucose in slurry, before hydrolysis (g/L)              |
| $\rho_L$ | Density of pretreated liquor (g/mL)                                                |

Recall that the uncertainty in any term is the sum of the uncertainties of its components multiplied by the relevant partial derivative.

$$U_{Y_{C-G}}^2 = \sum_{i=1}^n \left( \frac{\partial Y_{C-G}}{\partial k_i} \right)^2 U_{k_i}^2 \quad (3)$$

Specifically, the uncertainty in the yield of glucose from cellulose is calculated from the expression below.

$$U_{Y_{C-G}}^2 = \left( \frac{100}{1000 f_{IS} f_{PG} \gamma} \right)^2 U_{w_G}^2 + \left( \frac{100 w_G}{1000 f_{IS} f_{PG} \gamma^2} \right)^2 U_{\gamma}^2 \\ + \left( \frac{100 w_G}{1000 f_{IS}^2 f_{PG} \gamma} \right)^2 U_{f_{IS}}^2 + \left( \frac{100 w_G}{1000 f_{PG}^2 f_{IS} \gamma} \right)^2 U_{f_{PG}}^2 \quad (4)$$

Since the mass fraction of glucose in the solution ( $w_G$ ) is a derive quantity, its uncertainty is not measured. Rather its uncertainty is calculated from an analogous sum of terms, shown below.

$$U_{w_G}^2 = \left( \frac{(1-f_{IS})}{\rho_L} \right)^2 U_{c_{Gf}}^2 + \left( -\frac{(1-f_{IS})}{\rho_L} \right)^2 U_{c_{Gi}}^2 + \left( \frac{-(c_{Gf} - c_{Gi})}{\rho_L} \right)^2 U_{f_{IS}}^2 + \left( -\frac{(1-f_{IS})(c_{Gf} - c_{Gi})}{\rho_L^2} \right)^2 U_{\rho_L}^2 \quad (5)$$

Plugging Equation 5 in to the mass fraction term in Equation 4 results in an expression of the yield uncertainty that is a function of measurement uncertainties and the “base” values of certain variables, as well as any relevant proportionality constants.
